# Supplementary material for: Comparative Approaches to Microbial Profiling in Odontogenic Sinusitis with Periapical Lesions
Source: Research Square preprint supplement (doi:10.21203/rs.3.rs-8067667/v1), 2025-12-01
Supplement: Supplementary file 1 [file 1ec61c5d81afa190aad84e14.docx]

**Supplementary Table 3. Comparative summary of pathogens cultured from ODS patients' sinus irrigation and periapical lesions (PAL) using conventional microbiological culture methods.**

| **Patient** | **Tooth No** | **Pathogens cultured from the tooth** | **Pathogens cultured from sinus** | |
| --- | --- | --- | --- | --- |
| **Right sinus** | **Left sinus** |
| P2 | 26 | *Streptococcus viridans* | *Cutibacterium avidum** | *–* |
| 27 | *Neisseria elongata, Streptococcus viridans* |  |  |
| P3 | 27 | *Staphylococcus epidermidis, Lactobacillus salivarius* | *Streptococcus constellatus* | *–* |
| P4 | 17 | *Neisseria flava* | *–* | *–* |
| P5 | 26 | *Rothia mucilaginosa, Streptococcus gordonii* | *–* | *Streptococcus constellatus* |
| P6 | 27 | *Streptococcus mitis, Neisseria sicca, Peptoniphilus asaccharolyticus* | *–* | *Streptococcus constellatus* |
| P7 | 16 | *Streptococcus constellatus, Streptococcus mitis, Haemophilus parainfluenzae, Bifidobacterium spp., Rothia mucilaginosa* | *–* | *–* |
| P8 | 17 | *Streptococcus viridans, Neisseria spp.* | *–* | *–* |
| P9 | 15 | *Streptococcus mitis, Staphylococcus epidermidis* | *Streptococcus constellatus, Streptococcus viridans* | *–* |
| P10 | 26 | *Streptococcus viridans, Staphylococcus spp.* | *–* | *Streptococcus constellatus* |
| P12 | 16 | *Streptococcus viridans, Neisseria spp., CNS Staphylococcus spp.* | *Streptococcus anginosus* | *–* |
| P13 | 26 | *Hafnia alvei*, Veillonella spp., Streptococcus viridans* | *–* | *Hafnia alvei** |
| P14 | 26 | *Streptococcus viridans, Neisseria spp.* | *–* | *–* |
| P15 | 27 | *Streptococcus viridans, Neisseria spp.* | *–* | *Streptococcus anginosus* |
| P16 | 17 | *Streptococcus viridans* | *–* | *–* |
| P17 | 16 | *Streptococcus parasanguinis, Staphylococcus aureus** | *Staphylococcus aureus*, Streptococcus pyogenes** | *–* |
| P18 | 25 | *Streptococcus mitis, Neisseria mucosa* | *–* | *–* |
| 26 | *Streptococcus mitis, Neisseria mucosa* |
| 27 | *Streptococcus mitis, Neisseria mucosa* |
| P19 | 26 | *Streptococcus viridans* | *–* | *–* |
| P20 | 16 | *Streptococcus viridans, Neisseria spp.* | *Prevotella buccae** | *–* |
| P21 | 27 | *Streptococcus mitis, Neisseria flava* | *–* | *–* |
| P22 | 26 | *Streptococcus viridans* | *–* | *–* |
| P23 | 15 | *Streptococcus viridans* | *Streptococcus constellatus* | *–* |
| P24 | 27 | *Streptococcus pneumoniae** | *–* | *Fusobacterium nucleatum** |
| P25 | 17 | *Streptococcus mitis, Rothia mucilaginosa* | *Streptococcus anginosus* | *–* |
| P26 | 16 | *–* | *Raoultella ornithinolytica** | *–* |
| P27 | 17 | *Streptococcus parasanguinis, Rothia mucilaginosa* | *–* | *–* |
| P28 | 26 | *Streptococcus viridans* | *–* | *–* |
| P29 | 27 | *–* | *–* | *Staphylococcus epidermidis* |
| P30 | 17 | *Streptococcus viridans* | *Staphylococcus aureus** | *–* |
|  |  |  |  |  |
| Legend: | "-" no growth of bacteria | |  |  |
|  | "*" bacteria potentially pathogenic to the oral cavity and/or maxillary sinuses. | |  |  |
