# Supplementary material for: Comparative Approaches to Microbial Profiling in Odontogenic Sinusitis with Periapical Lesions
Source: Research Square preprint supplement (doi:10.21203/rs.3.rs-8067667/v1), 2025-12-01
Supplement: Supplementary file 2 [file 79639e3c8708463941d38d65.docx]

| **Supplementary Table 1. Primer pairs used for QPCR.** | |  |  |  |  |  |  |  |  |  |  |  |
| --- | --- | --- | --- | --- | --- | --- | --- | --- | --- | --- | --- | --- |
| The sequences of primers, the length of primers and PCR products, and the specificity of primer pairs that have been analyzed both *in silico* and experimentally. | | | | | | |  |  |  |  |  |  |
|  |  |  |  |  |  |  |  |  |  |  |  |  |
| **Template genomic bacterial DNA** | **Forward primer name** | **Forward primer sequence** | **Forward primer length [nt]** | **Reverse primer name** | **Reverse primer sequence** | **Reverse primer length [nt]** | **Product length [bp]** | **Specificity_Primer-BLAST on RefSeq representative genomes_Bacteria** | **Specificity_experimental verification on bacterial DNA from the same genus** | **Specificity_Primer-BLAST on Refseq representative genomes_*Homo sapiens*** | **Specificity_Primer-BLAST on mtDNA NC_012920.1_ *Homo sapiens*** | **Specificity_experimental verification on human DNA** |
| *Eikenella corrodens* | EicorF1 | GTGGCGAACGGGTGAGTAAT | 20 | EicorR1 | AATAACGCGAGGTCTTGCGA | 20 | 124 | *Eikenella corrodens* | NA | No predicted amplification | No predicted amplification | Amplification detected, quantity outside of a standard curve range (<1pg) |
| *Fusobacterium nucleatum* subsp. *nucleatum* | FuoralF1 | CCGCGGTAATACGTATGTCAC | 21 | FuoralR1 | CGCAATACAGAGTTGAGCCCT | 21 | 110 | *Fusobacterium nucleatum subsp. nucleatum, F. animalis, F. fusiforme, F. polymorphum, F. vincentii, F. canifelinum, F. periodonticum, F. simiae* (*Fusobacterium* spp. from the human mouth, pharynx, nasal passages, sinuses and esophagus) | NA | No predicted amplification | No predicted amplification | Amplification detected, quantity outside of a standard curve range (<1pg) |
| *Peptostreptococcus anaerobius* | PeanaF1 | AGGAAGCCCCGGCTAACTA | 19 | PeanaR2 | CTCAAGTCTTCCAGTTTCGGA | 21 | 161 | *Peptostreptococcus anaerobius* | NA | Potential product 2746 bp, mismatches | No predicted amplification | No amplicifaction |
| *Porphyromonas endodontalis* | PoendF1 | CGTAACGCGTATGCAACCTG | 20 | PoendR1 | CTTTCCGTCCTCCTCCATGC | 20 | 100 | *Porphyromonas endodontalis* | Amplification detected on *P. gingivalis* DNA (1 ng), quantity outside of a standard curve range (<100fg) | Potential product 3025 bp, mismatches | No predicted amplification | Amplification detected, different melting temperature of the product |
| *Porphyromonas gingivalis* | PoginF1 | CGACCGGATGCGAATCTCTA | 20 | PoginR1 | GAACGTATTCACCGCGCCAT | 20 | 116 | *Porphyromonas gingivalis* | Amplification detected on *P. endodentalis* DNA (1 ng), quantity outside of a standard curve range (<100fg) | No predicted amplification | No predicted amplification | No amplicifaction |
| *Prevotella intermedia* | PrintF1 | CTGTTAGCGCCTGGCGTTA | 19 | PrintR1 | GTCAACATCTCTGTATCCTGCG | 22 | 191 | *Prevotella intermedia* | Amplification detected on *P. nigrescens* DNA (1ng), quantity comparable to the lowest detected standard curve point (100fg) | Potential product 1563 bp, mismatches at the 5' end | No predicted amplification | No amplicifaction |
| *Prevotella nigrescens* | PrnigF1 | CGCCATTGCATGTACCTCAT | 20 | PrnigR1 | TCACAACACGCTTAACAGACC | 21 | 134 | *Prevotella nigrescens* | No amplification on *P. intermedia* DNA (1ng) | Potential product 3701 bp, mismatches | No predicted amplification | No amplicifaction |
| *Pseudomonas aeruginosa* | PsaerF1 | GCTAATACCGCATACGTCCTGA | 22 | PsaerR1 | GCCTTGGTAGGCCTTTACCC | 20 | 110 | *Pseudomonas aeruginosa* | NA | Potential product 2844 bp, mismatches | No predicted amplification | No amplicifaction |
| *Staphylococcus aureus*subsp.*aureus Rosenbach* | StaurF1 | ACGAGAAGCTTGCTTCTCTGAT | 22 | StaurR1 | GCAGCGCGGATCCATCTAT | 19 | 176 | *Staphylococcus aureus, S. argenteus* | NA | No predicted amplification | No predicted amplification | No amplicifaction |
| *Streptococcus constellatus* subsp*. constellatus* | SAGF1 | CCACACTGGGACTGAGACAC | 20 | SAGR1 | AGCCGTCCCTTTCTGGTTAAG | 21 | 199 | *Streptococcus constellatus, S. intermedius, S. anginosus* | Amplification detected on *S. constellatus* and *S. intermedius* DNA | Potential product 2024 bp, mismatches | No predicted amplification | Amplification detected, quantity outside of a standard curve range (<1pg) |
