# Supplementary material for: Comparative Approaches to Microbial Profiling in Odontogenic Sinusitis with Periapical Lesions
Source: Research Square preprint supplement (doi:10.21203/rs.3.rs-8067667/v1), 2025-12-01
Supplement: Supplementary file 3 [file c871670d3136d74d5130061a.docx]

| **Supplementary Table 2. Reference genomic bacterial DNA used for the standard curve generation in QPCR.** | | | | |  |  |  |  |  |  |  |
| --- | --- | --- | --- | --- | --- | --- | --- | --- | --- | --- | --- |
| Information regarding the source of the reference genomic bacterial DNA, accompanied by the DMSZ reference number, the size, and the GC content of the genome (retrieved from the ATCC Genome Portal). | | | | | | | | |  |  |  |
| Additionally, the calculated number of genomes per indicated mass of genomic DNA are provided. | | | |  |  |  |  |  |  |  |  |
|  |  |  |  |  |  |  |  |  |  |  |  |
| **Reference genomic bacterial DNA** | **DMSZ ref. no.** | **Genome size (bp)** | **%GC** | **Genome mass [fg]** | **Number of genomes/10 ng** | **Number of genomes/1 ng** | **Number of genomes/100 pg** | **Number of genomes/10 pg** | **Number of genomes/1 pg** | **Number of genomes/100 fg** | **Number of genomes/10 fg** |
| *Eikenella corrodens* | DSM 8340 | 2192578 | 55,65 | 2,24 | 4457726 | 445773 | 44577 | 4458 | 446 | 45 | 4 |
| *Fusobacterium nucleatum* subsp. *nucleatum* | DSM 15643 | 2177851 | 27,15 | 2,23 | 4489947 | 448995 | 44899 | 4490 | 449 | 45 | 4 |
| *Peptostreptococcus anaerobius* | DSM 2949 | 2192403 | 35,86 | 2,24 | 4459514 | 445951 | 44595 | 4460 | 446 | 45 | 4 |
| *Porphyromonas endodontalis* | DSM 24491 | 2102790 | 47,53 | 2,15 | 4648681 | 464868 | 46487 | 4649 | 465 | 46 | 5 |
| *Porphyromonas gingivalis* | DSM 20709 | 2399479 | 48,34 | 2,45 | 4073831 | 407383 | 40738 | 4074 | 407 | 41 | 4 |
| *Prevotella intermedia* | DSM 20706 | 2607249 | 43,38 | 2,67 | 3749492 | 374949 | 37495 | 3749 | 375 | 37 | 4 |
| *Prevotella nigrescens* | DSM 13386 | 2671473 | 42,63 | 2,73 | 3659396 | 365940 | 36594 | 3659 | 366 | 37 | 4 |
| *Pseudomonas aeruginosa* | DSM 50071 | 6317054 | 66,52 | 6,46 | 1546953 | 154695 | 15470 | 1547 | 155 | 15 | 2 |
| *Staphylococcus aureus*subsp.*aureus Rosenbach* | DSM 20231 | 2782564 | 32,84 | 2,85 | 3513857 | 351386 | 35139 | 3514 | 351 | 35 | 4 |
| *Streptococcus constellatus* subsp*. constellatus* | DSM 20575 | 1901581 | 38,07 | 1,95 | 5141354 | 514135 | 51414 | 5141 | 514 | 51 | 5 |
